# Supplementary material
Source: PubMed Central journal article supplement (PMC3249101)
Supplement: supp_M111.264614_jbc.M111.264614-1.pdf [file supp_M111.264614_jbc.M111.264614-1.pdf]

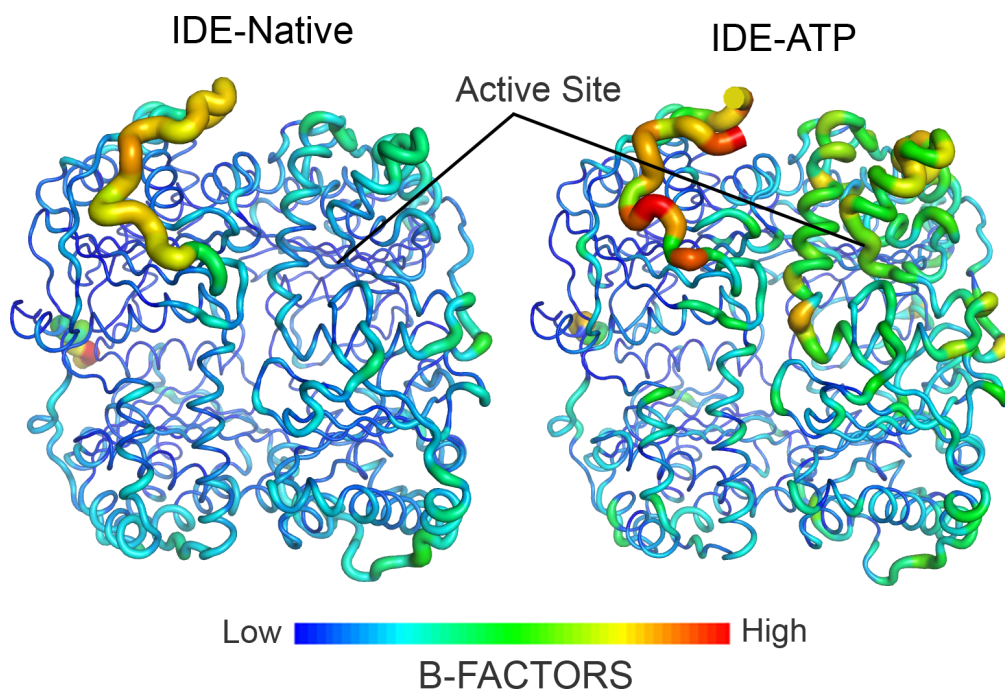

**Figure S1. IDE thermal factors.** Relative thermal factors for C-alpha atoms are color coded as indicated for unliganded IDE and IDE crystallized in the presence of ATP. The thickness of the backbone worm also indicates the relative thermal factors.
