# Supplementary material
Source: PubMed Central journal article supplement (PMC3249101)
Supplement: supp_M111.264614_jbc.M111.264614-2.pdf [file supp_M111.264614_jbc.M111.264614-2.pdf]

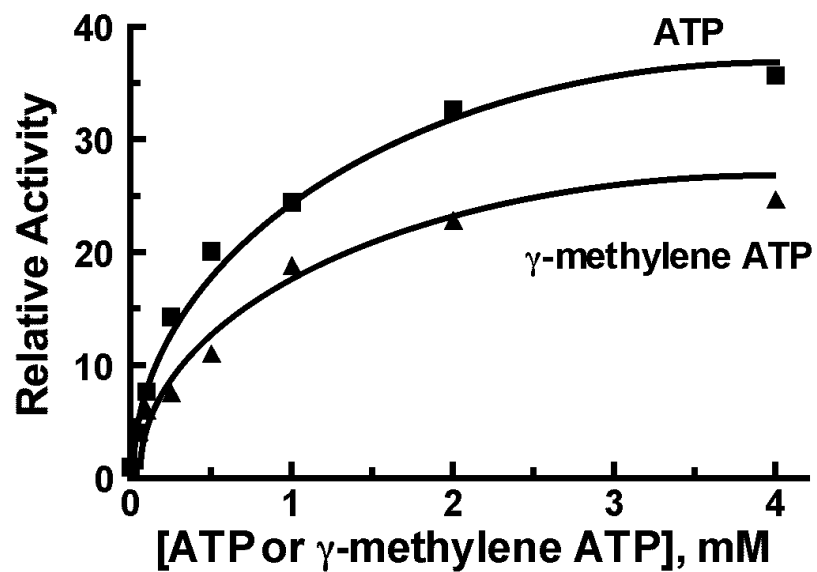

**Figure S2.** Ability of  $\gamma$ -methylene-ATP versus ATP to increase the IDE-dependent hydrolysis of Abz-GGFLRKHGQ-EDDnp. Activity was determined in 50 mM Tris-HCl, pH 7.4 with 10  $\mu$ M Abz-GGFLRKHGQ-EDDnp as substrate and indicated concentrations of ATP or  $\gamma$ -methylene-ATP. Reactions contained 0.1  $\mu$ g of protein.
